# Supplementary material for: Analysis of sequential hair segments reflects changes in the metabolome across the trimesters of pregnancy
Source: PubMed Central journal article supplement (PMC5758601; doi:10.1038/s41598-017-18317-7), 2018-01-08
Supplement: 41598_2017_18317_MOESM1_ESM.pdf [file 41598_2017_18317_MOESM1_ESM.pdf]

# **Analysis of sequential hair segments reflects changes in the metabolome across the trimesters of pregnancy**

**Thibaut D.J. Delplancke<sup>1,2+</sup>, Jamie V. de Seymour<sup>3+</sup>, Chao Tong<sup>1,2+</sup>, Karolina Sulek<sup>4</sup>, Yinyin Xia<sup>5</sup>, Hua Zhang<sup>1,2</sup>, Ting-Li Han<sup>1,2,3\*</sup>, Philip N. Baker<sup>1,2,6</sup>**

- <sup>1</sup> Department of Obstetrics and Gynaecology, The First Affiliated Hospital of Chongqing Medical University, Chongqing, China;
- <sup>2</sup> International Joint Laboratory of Maternal and Fetal Medicine, Chongqing Medical University, Chongqing, China;
- <sup>3</sup> Liggins Institute, University of Auckland, Auckland, New Zealand;
- <sup>4</sup> The Novo Nordisk Foundation Center for Basic Metabolic Research, Faculty of Health and Medical Sciences, University of Copenhagen, Blegdamsvej, 3b, 6.6.24, Copenhagen, Denmark;
- <sup>5</sup> Department of Occupational and Environmental Hygiene, School of Public Health and Management, Chongqing Medical University, Chongqing, China;
- <sup>6</sup> College of Medicine, Biological Sciences and Psychology, University of Leicester, Leicester, United Kingdom.

<sup>+</sup> These authors contributed equally to this work.

\*Correspondence: Ting-li Han, Email: [t.han@auckland.ac.nz](mailto:t.han@auckland.ac.nz)

**Supplementary Table 1.** Metabolites identified by GC-MS and their classification

| <b>Classification</b>                                   | <b>Compounds</b>                                                                                                                                                                                                                                                                                                                                                                                                                                                                                                                                                                                                                                                                                                                                                                                                                                                                                                                                                                                                                                                                                                                                                                                                                                                                                                                                                                                                                                                                                                                                                                                                                                                                                                                                               |
|---------------------------------------------------------|----------------------------------------------------------------------------------------------------------------------------------------------------------------------------------------------------------------------------------------------------------------------------------------------------------------------------------------------------------------------------------------------------------------------------------------------------------------------------------------------------------------------------------------------------------------------------------------------------------------------------------------------------------------------------------------------------------------------------------------------------------------------------------------------------------------------------------------------------------------------------------------------------------------------------------------------------------------------------------------------------------------------------------------------------------------------------------------------------------------------------------------------------------------------------------------------------------------------------------------------------------------------------------------------------------------------------------------------------------------------------------------------------------------------------------------------------------------------------------------------------------------------------------------------------------------------------------------------------------------------------------------------------------------------------------------------------------------------------------------------------------------|
| <b>Alcohols</b>                                         | 4-pentene-2-ol <sup>e</sup> ; 1-hexadecanol <sup>d</sup> ; 1-dodecanol <sup>c</sup> ; cyclohexanol <sup>d</sup> ; 2-ethyl-1-hexanol <sup>d</sup> ; n-tridecan-1-ol;                                                                                                                                                                                                                                                                                                                                                                                                                                                                                                                                                                                                                                                                                                                                                                                                                                                                                                                                                                                                                                                                                                                                                                                                                                                                                                                                                                                                                                                                                                                                                                                            |
| <b>Amino acid and derivatives</b>                       | alanine <sup>a</sup> ; glycine <sup>a</sup> ; valine <sup>a</sup> ; leucine <sup>a</sup> ; isoleucine <sup>a</sup> ; proline <sup>a</sup> ; threonine <sup>a</sup> ; aspartic acid <sup>a</sup> ; asparagine <sup>a</sup> ; serine <sup>a</sup> ; beta-alanine <sup>a</sup> ; glutamic acid <sup>a</sup> ; methionine <sup>a</sup> ; phenylalanine <sup>a</sup> ; cysteine <sup>a</sup> ; ornithine <sup>a</sup> ; lysine <sup>a</sup> ; histidine <sup>a</sup> ; tyrosine <sup>a</sup> ; tryptophan <sup>a</sup> ; 1-aminocyclopropane-1-carboxylic acid <sup>a</sup> ; 4-aminobutyric acid (GABA) <sup>a</sup> ; 2-aminobutyric acid <sup>a</sup> ; pyroglutamic acid <sup>a</sup> ; 1-aminocyclopentanecarboxylic acid <sup>d</sup> ; N-(carboxymethyl)-L-alanine <sup>a</sup> ; glycyl-L-leucine <sup>c</sup> ; glycyl-L-proline <sup>c</sup> ; l-alanyl-l-isoleucine <sup>e</sup> ; l-alanyl-l-leucine <sup>d</sup> ; l-isoleucylglycine <sup>c</sup> ; l-leucyl-l-alanine <sup>d</sup> ; l-leucylglycine <sup>c</sup> ; l-norleucyl-l-norleucine <sup>d</sup> ; l-norvalyl-l-norvaline <sup>e</sup> ; l-prolylglycine <sup>d</sup> ; N-methoxy-N-methylamino-methyl-(S)-proline <sup>e</sup> ; N.alpha.-acetyl-l-lysine <sup>e</sup> ; l-alanyl-l-proline <sup>d</sup> ; d-prolyl-d-proline <sup>c</sup> ;                                                                                                                                                                                                                                                                                                                                                                                                                                               |
| <b>Anti-oxidants</b>                                    | Glutathione;                                                                                                                                                                                                                                                                                                                                                                                                                                                                                                                                                                                                                                                                                                                                                                                                                                                                                                                                                                                                                                                                                                                                                                                                                                                                                                                                                                                                                                                                                                                                                                                                                                                                                                                                                   |
| <b>Co-factors</b>                                       | NADP_NADPH <sup>a</sup> ;                                                                                                                                                                                                                                                                                                                                                                                                                                                                                                                                                                                                                                                                                                                                                                                                                                                                                                                                                                                                                                                                                                                                                                                                                                                                                                                                                                                                                                                                                                                                                                                                                                                                                                                                      |
| <b>Drugs</b>                                            | ethambutol <sup>d</sup> ;                                                                                                                                                                                                                                                                                                                                                                                                                                                                                                                                                                                                                                                                                                                                                                                                                                                                                                                                                                                                                                                                                                                                                                                                                                                                                                                                                                                                                                                                                                                                                                                                                                                                                                                                      |
| <b>Branched, Saturated, and Unsaturated Fatty acids</b> | 10,13-dimethyltetradecanoic acid <sup>a</sup> ; caprylic acid <sup>a</sup> ; dodecanoic acid <sup>a</sup> ; myristic acid <sup>a</sup> ; pentadecanoic acid <sup>a</sup> ; margaric acid <sup>a</sup> ; stearic acid <sup>a</sup> ; heneicosanoic acid <sup>a</sup> ; tridecanoic acid <sup>d</sup> ; tetradecanoic acid <sup>e</sup> ; butanoic acid <sup>e</sup> ; hexanoic acid <sup>d</sup> ; trans-vaccenic acid <sup>a</sup> ; 9-octadecenoic acid <sup>e</sup> ; 2-butenic acid <sup>e</sup> ;                                                                                                                                                                                                                                                                                                                                                                                                                                                                                                                                                                                                                                                                                                                                                                                                                                                                                                                                                                                                                                                                                                                                                                                                                                                          |
| <b>Glycolytic intermediates</b>                         | pyruvic acid <sup>a</sup> ;                                                                                                                                                                                                                                                                                                                                                                                                                                                                                                                                                                                                                                                                                                                                                                                                                                                                                                                                                                                                                                                                                                                                                                                                                                                                                                                                                                                                                                                                                                                                                                                                                                                                                                                                    |
| <b>Glyoxylate cycle intermediates</b>                   | glyoxylic acid <sup>a</sup> ;                                                                                                                                                                                                                                                                                                                                                                                                                                                                                                                                                                                                                                                                                                                                                                                                                                                                                                                                                                                                                                                                                                                                                                                                                                                                                                                                                                                                                                                                                                                                                                                                                                                                                                                                  |
| <b>Organic acids</b>                                    | 2-oxobutyric acid <sup>a</sup> ; 2-oxovaleric acid <sup>a</sup> ; malonic acid <sup>a</sup> ; 3-methyl-2-oxopentanoic acid <sup>a</sup> ; 4-Methyl-2-oxopentanoic acid <sup>a</sup> ; levulinic acid <sup>a</sup> ; lactic acid <sup>a</sup> ; glutaric acid <sup>a</sup> ; benzoic acid <sup>a</sup> ; citraconic acid <sup>a</sup> ; 2-hydroxybutyric acid <sup>a</sup> ; citramalic acid <sup>a</sup> ; adipic acid <sup>a</sup> ; dimethyl aminomalonic acid <sup>a</sup> ; suberic acid <sup>a</sup> ; azelaic acid <sup>a</sup> ; salicylic acid <sup>a</sup> ; hydroxybenzoic acid <sup>a</sup> ; dipicolinic acid <sup>a</sup> ; 4-hydroxyphenylacetic acid <sup>a</sup> ; 4-hydroxycinnamic acid <sup>a</sup> ; acetic acid <sup>c</sup> ; 1-methylpyridin(2H)-2-one-5-carboxylic acid <sup>e</sup> ; 1-propene-1,2,3-tricarboxylic acid <sup>c</sup> ; 1,3-benzenedicarboxylic acid <sup>e</sup> ; 1,4-benzenedicarboxylic acid <sup>c</sup> ; 2-(1-hydroxy-1-methylethyl)pyrrolidine-1-carboxylic acid <sup>e</sup> ; 2-(4-fluoro-6-oxo-1,6-dihydro-pyrimidin-2-ylamino)-propionic acid <sup>d</sup> ; 3,4-oxazolidinecarboxylic acid <sup>d</sup> ; 4-pyridinecarboxylic acid <sup>d</sup> ; benzenepropanoic acid <sup>e</sup> ; carbamic acid <sup>d</sup> ; hexanedioic acid <sup>c</sup> ; N-hydroxy-N-ethylcarbamic acid <sup>e</sup> ; phthalic acid <sup>d</sup> ; propanoic acid <sup>e</sup> ; pyrrolidine-2-one-trans-4,5-dicarboxylic acid <sup>e</sup> ; benzeneacetic acid <sup>c</sup> ; but-2-enedioic acid <sup>c</sup> ; 3-oxazolidinecarboxylic acid <sup>e</sup> ; 2-oxomalonic acid <sup>e</sup> ; 3,4-methylenedioxyphenylacetic acid <sup>e</sup> ; 2-pyrrolidinecarboxylic acid <sup>e</sup> ; carbonic acid <sup>e</sup> ; |
| <b>Organic compounds</b>                                | benzaldehyde <sup>d</sup> ; dodecane <sup>c</sup> ; tetradecane <sup>d</sup> ; tridecane <sup>a</sup> ; 4-octene <sup>e</sup> ; 2-propenamide <sup>e</sup> ; 3-pyridinecarboxamide <sup>e</sup> ; 4-amino-3-ethyl-2-thioxo-2, 3-dihydro-thiazole-5-carboxylic acid methylamide <sup>e</sup> ; 1-phenyl-1-propanamine <sup>e</sup> ; benzenamine <sup>e</sup> ; creatinine <sup>a</sup> ; ethyl 2-(ethoxycarbonyloxy) ethylcarbamate <sup>e</sup> ; 3,4-dihydroxymandelic acid <sup>e</sup> ; 2,4-di-tert-butylphenol <sup>a</sup> ; 4,4'-dimethoxybenzil <sup>e</sup> ; 4-hexylanisole <sup>e</sup> ; 2,6-difluoropyridine <sup>e</sup> ; ethane <sup>c</sup> ; pentafluoropropionic acid <sup>e</sup> ; trichloroacetic acid <sup>d</sup> ; 1,3-dioxane <sup>e</sup> ; diethylamino-acetic acid <sup>c</sup> ; 5-methyluracil <sup>e</sup> ; benzene <sup>e</sup> ; 2-methylpentan-2-yl trifluoroacetate <sup>d</sup> ; anthracene <sup>e</sup> ; 3H-benzo[4,5]furo[3,2-d]pyrimidine-4-thione <sup>e</sup> ; 5-(β-bromoallyl)-5-                                                                                                                                                                                                                                                                                                                                                                                                                                                                                                                                                                                                                                                                                                                              |

|                                                     |                                                                                                                                                                                                                                                                                                                                                                                                                                                                                                                                                                                                                                                                                                                                                                                                                                                                                                                                                                                                                                                                                                                                                                                                           |
|-----------------------------------------------------|-----------------------------------------------------------------------------------------------------------------------------------------------------------------------------------------------------------------------------------------------------------------------------------------------------------------------------------------------------------------------------------------------------------------------------------------------------------------------------------------------------------------------------------------------------------------------------------------------------------------------------------------------------------------------------------------------------------------------------------------------------------------------------------------------------------------------------------------------------------------------------------------------------------------------------------------------------------------------------------------------------------------------------------------------------------------------------------------------------------------------------------------------------------------------------------------------------------|
|                                                     | (1-methylbutyl) barbituric acid <sup>e</sup> ; 5-Hydroxy-2-methylthiopyrimidine <sup>e</sup> ; 2H-tetrazole <sup>e</sup> ; N-allyl morpholine <sup>e</sup> ; 1-(2-Thienylmethyl)-2-thiourea <sup>e</sup> ; 1H-indene <sup>d</sup> ; 3-piperidinol <sup>d</sup> ; 5,10-diethoxy-2,3,7,8-tetrahydro-1H,6H-dipyrrolo[1,2-a:1',2'-d]pyrazine <sup>e</sup> ; 5,6-epoxy-6-methyl-2-heptanone <sup>e</sup> ; ethyl N-(2-methoxyethyl)alaninate <sup>e</sup> ; N,N-diethylglycine methyl ester <sup>e</sup> ; pyrrolo[1,2-a]pyrazine-1,4-dione <sup>e</sup> ; pyrrolo[1,2-a]pyrazine-3-propanamide <sup>e</sup> ; 1-oxa-3,4-diazacyclopentadiene <sup>e</sup> ; 5-cyano-4-methoxyamino-7-phenyl-hept-6-enoic acid <sup>e</sup> ; 5H-imidazo(2,1-a)isoindole <sup>e</sup> ; dimethyl ethylidenemalonate <sup>e</sup> ; methyl-2-ethoxyacetate <sup>e</sup> ; dibutyl phthalate <sup>a</sup> ; dimethyl phthalate <sup>c</sup> ; ethyl 2,5,8,11,14,17-hexaoxonadecan-19-oate <sup>e</sup> ; ethyl orthoformate <sup>e</sup> ; isobutyl methyl phthalate <sup>c</sup> ; bis(2-ethylhexyl) phthalate <sup>c</sup> ; methyl 4-tert-butylbenzoate <sup>c</sup> ; 4H-benzo[f]pyrrolo[1,2-a][1,4]diazepine <sup>e</sup> ; |
| <b>Tricarboxylic acid (TCA) cycle intermediates</b> | oxalic acid <sup>a</sup> ; fumaric acid <sup>a</sup> ; succinic acid <sup>a</sup> ; malic acid <sup>a</sup> ; 2-oxoglutaric acid <sup>a</sup> ; cis-aconitic acid <sup>a</sup> ; citric acid <sup>a</sup> ;                                                                                                                                                                                                                                                                                                                                                                                                                                                                                                                                                                                                                                                                                                                                                                                                                                                                                                                                                                                               |
| <b>Vitamins</b>                                     | nicotinic acid <sup>a</sup> ; nicotinamide <sup>a</sup> .                                                                                                                                                                                                                                                                                                                                                                                                                                                                                                                                                                                                                                                                                                                                                                                                                                                                                                                                                                                                                                                                                                                                                 |

<sup>a</sup>In-house MCF library identification match factor  $\geq 75\%$ ; <sup>b</sup>In-house MCF library identification match factor below 75%;

<sup>c</sup>NIST14 library identification match factor  $\geq 85\%$ ; <sup>d</sup>NIST14 library identification match factor between 85 and 75%;

<sup>e</sup>NIST14 library identification match factor below 75%. Higher match % were used for NIST14 library because it is less accurate compared to in-house MCF library.

**Supplementary Table 2.** Metabolites identified by LC-MS and their classification.

| <b>Classification</b>                      | <b>Compounds</b>                          | <b>Adducts</b>                   | <b>m/z</b>           |
|--------------------------------------------|-------------------------------------------|----------------------------------|----------------------|
| <b>Alcohols and derivatives</b>            | 3-Methyl-2-butanol                        | 2M+ACN+H                         | 218.211              |
|                                            | Hexan-2-ol                                | 2M+ACN+H                         | 246.242              |
|                                            | octane-1,2-diol                           | 2M+ACN+H                         | 334.295              |
|                                            | Hydroxycitronellol                        | M+ACN+H                          | 216.195              |
|                                            | (R,Z)-Tridec-6-en-2-ol                    | M+ACN+H                          | 240.231              |
|                                            | Tetradecanol                              | M+ACN+H                          | 256.263              |
|                                            | 5E-Tetradecen-1-ol                        | M+Na                             | 235.204              |
|                                            | 2,6,8,12-Tetramethyl-2,4-tridecadien-1-ol | M+H                              | 253.252              |
|                                            | 7E-Tetradecen-1-ol                        | M+Na                             | 235.203              |
|                                            | 14-methyl-1-hexadecanol                   | M+ACN+H                          | 298.31               |
|                                            | 11-methyl-1,2-heptadecanediol             | M+ACN+H                          | 328.321              |
|                                            | icosane-1,3-diol                          | M+ACN+H                          | 356.353              |
|                                            | 13-methyl-1,2-nonadecanediol              | M+ACN+H                          | 356.352              |
|                                            | Octadecanol                               | M+ACN+H                          | 312.326              |
|                                            | 4E,6Z,10Z-Hexadecatrien-1-ol              | M+H-H <sub>2</sub> O,<br>M+ACN+H | 278.247              |
|                                            | (R)-Dihydrocitronellol                    | 2M+ACN+H                         | 358.368              |
|                                            | 1-Hydroxy-3-nonanone                      | 2M+ACN+H                         | 358.296              |
|                                            | phthiocerol                               | M+ACN+H                          | 526.517              |
|                                            | <b>Amino acid and derivatives</b>         | Isoleucyl-Proline                | M+H-H <sub>2</sub> O |
| (2S,2'S)-Pyrosaccharopine                  |                                           | M+H-2H <sub>2</sub> O            | 223.109              |
| Prolyl-Hydroxyproline                      |                                           | M+ACN+H                          | 270.144              |
| L-cis-3-Amino-2-pyrrolidinecarboxylic acid |                                           | M+H-H <sub>2</sub> O             | 113.07               |
| Threoninyl-Isoleucine                      |                                           | M+H-2H <sub>2</sub> O            | 197.128              |
| 5-Hydroxy-L-tryptophan                     |                                           | M+H, M+2Na-<br>H                 | 221.091              |
| gln-tyr                                    |                                           | M+H-2H <sub>2</sub> O            | 274.118              |
| L-cis-Cyclo(aspartylphenylalanyl)          |                                           | M+ACN+H                          | 304.129              |
| N-methylphenylalanine                      |                                           | M+H                              | 180.101              |
| Cysteinyl-Methionine                       |                                           | M+H-2H <sub>2</sub> O            | 217.046              |
| Prolyl-Tryptophan                          |                                           | M+ACN+Na                         | 365.158              |
| Tryptophyl-Glycine                         |                                           | M+H-2H <sub>2</sub> O            | 226.097              |
| Lysyl-Valine                               |                                           | M+H-H <sub>2</sub> O             | 228.171              |
| Seriny-Cysteine                            |                                           | M+2Na-H                          | 253.023              |
| Indoleacetyl glutamine                     |                                           | M+H-H <sub>2</sub> O             | 286.118              |
| Phenylalanyl-Alanine                       |                                           | M+H-2H <sub>2</sub> O            | 201.103              |
| Tyrosyl-Threonine                          |                                           | M+H-2H <sub>2</sub> O            | 247.109              |
| Lysyl-Asparagine                           |                                           | M+2Na                            | 153.063              |
| Gamma-glutamyl-Aspartate                   |                                           | M+Na                             | 284.086              |

|                                 |                                              |                                    |         |
|---------------------------------|----------------------------------------------|------------------------------------|---------|
|                                 | Tryptophyl-Hydroxyproline                    | M+H-H <sub>2</sub> O,<br>M+H, M+Na | 300.134 |
|                                 | L-Tryptophan                                 | M+H-H <sub>2</sub> O               | 187.086 |
|                                 | Leucyl-Lysine                                | M+H-2H <sub>2</sub> O              | 224.176 |
|                                 | Glutamyl-Arginine                            | M+H-H <sub>2</sub> O,<br>M+H       | 285.144 |
|                                 | Isoleucyl-Phenylalanine                      | M+H-H <sub>2</sub> O               | 261.159 |
|                                 | Gamma-glutamyl-Histidine                     | M+ACN+H                            | 325.161 |
|                                 | Aspartyl-Hydroxyproline                      | M+Na                               | 269.074 |
|                                 | (5-L-Glutamyl)-L-amino acid                  | M+Na                               | 241.079 |
|                                 | Tryptophyl-Glutamine                         | M+ACN+H                            | 374.184 |
|                                 | Tryptophyl-Lysine                            | M+Na                               | 355.173 |
|                                 | Glutaminyl-Asparagine                        | 2M+Na                              | 543.214 |
|                                 | Glycyl-Tryptophan                            | 2M+Na                              | 545.21  |
|                                 | Asparaginyl-Valine                           | M+2Na-H                            | 276.093 |
|                                 | Alanyltryptophan                             | 2M+Na                              | 573.242 |
|                                 | Alanyl-Isoleucine                            | 2M+K                               | 443.226 |
|                                 | Glutaminyl-Proline                           | M+ACN+Na                           | 307.137 |
|                                 | Diphthine                                    | 2M+K                               | 638.338 |
| <b>Cosmetic and metabolites</b> | 4-amino-MX                                   | M+Na                               | 290.111 |
| <b>Drug and metabolites</b>     | Tegafur                                      | M+H-2H <sub>2</sub> O              | 165.047 |
|                                 | Nepafenac                                    | M+H                                | 255.113 |
|                                 | 4-Hydroxy-estazolam                          | M+ACN+H                            | 352.095 |
|                                 | Hydroxylated N-acetyl desmethyl frovatriptan | M+H-2H <sub>2</sub> O              | 254.129 |
|                                 | Ciclopirox                                   | M+ACN+H                            | 249.16  |
|                                 | Tetracaine                                   | M+Na                               | 287.174 |
|                                 | Sulfasalazine                                | M+2H                               | 200.041 |
|                                 | Desmethylnortriptyline                       | M+H-H <sub>2</sub> O               | 232.147 |
|                                 | Orciprenaline-3-O-sulfate                    | M+H-H <sub>2</sub> O               | 274.073 |
|                                 | Tofisopam                                    | M+2H                               | 192.102 |
|                                 | Aprobarbital                                 | M+H-2H <sub>2</sub> O              | 175.086 |
|                                 | NPC                                          | M+K                                | 557.182 |
|                                 | 5'-Hydroxymethyl meloxicam                   | M+ACN+Na                           | 431.046 |
|                                 | Venlafaxine                                  | M+H-H <sub>2</sub> O,<br>M+H       | 278.211 |
|                                 | Nimesulide                                   | M+H-H <sub>2</sub> O               | 291.044 |
|                                 | Pyridostigmine                               | 2M+H                               | 363.202 |
|                                 | (S)-Reticuline                               | M+K                                | 368.127 |
|                                 | (S)-MHD                                      | M+H                                | 255.112 |
|                                 | Ibudilast                                    | M+H                                | 231.148 |
|                                 | Didesmethyl doxepin                          | M+H-2H <sub>2</sub> O              | 216.116 |
|                                 | Oxaprozin                                    | M+ACN+H                            | 335.139 |

|                                   |                                |         |
|-----------------------------------|--------------------------------|---------|
| Minoxidil                         | M+ACN+H                        | 251.161 |
| Cetirizine                        | M+H-H <sub>2</sub> O           | 371.151 |
| Levofloxacin                      | M+ACN+H                        | 403.177 |
| Fenoprofen                        | M+ACN+H                        | 284.129 |
| Doxylamine                        | M+H                            | 271.18  |
| Cinacalcet                        | M+ACN+H                        | 399.205 |
| Pentazocine                       | M+2Na-H                        | 330.181 |
| Marimastat                        | M+H-2H <sub>2</sub> O          | 296.197 |
| N-Desmethylcitalopram             | 2M+3H <sub>2</sub> O+2H        | 324.159 |
| Rimantadine                       | 2M+ACN+Na                      | 422.352 |
| Pseudoephedrine                   | 2M+H                           | 331.237 |
| 3-Hydroxymonoethylglycinexylidide | M+ACN+H                        | 264.17  |
| Ropivacaine                       | M+H-H <sub>2</sub> O           | 257.2   |
| Dapiprazole                       | M+H                            | 326.233 |
| Carboxy-ibuprofen                 | M+H-2H <sub>2</sub> O          | 201.09  |
| Bupivacaine                       | M+H-H <sub>2</sub> O           | 271.216 |
| N-Desmethylpromazine              | M+H                            | 271.125 |
| Levobupivacaine                   | M+H-H <sub>2</sub> O           | 271.216 |
| Pentamidine                       | M+ACN+Na                       | 404.207 |
| Sufentanil                        | M+H-H <sub>2</sub> O           | 369.198 |
| Vorinostat                        | M+H-2H <sub>2</sub> O          | 229.134 |
| Levallorphan                      | M+ACN+H                        | 325.227 |
| Tapentadol                        | M+H                            | 222.184 |
| Mupirocin                         | M+H-H <sub>2</sub> O           | 483.297 |
| o-O-glucuronide rosiglitazone     | M+H-2H <sub>2</sub> O          | 514.13  |
| Eletriptan N-oxide                | M+H                            | 399.173 |
| Stanozolol                        | M+H-H <sub>2</sub> O           | 311.248 |
| Linagliptin                       | M+2H                           | 237.124 |
| Epinastine                        | M+ACN+Na                       | 313.143 |
| Bevantolol                        | M+H-2H <sub>2</sub> O,<br>M+Na | 310.18  |
| Diethylpropion                    | M+ACN+Na                       | 269.163 |
| Ethopropazine                     | M+H                            | 313.173 |
| Dydrogesterone                    | M+H                            | 313.217 |
| Nabumetone                        | M+H                            | 229.122 |
| Trisodium citrate dihydrate       | M+H-H <sub>2</sub> O           | 276.992 |
| Benzphetamine                     | M+ACN+H                        | 281.202 |
| Norethindrone                     | M+H                            | 299.2   |
| Diphenhydramine N-glucuronide     | M+K,<br>M+ACN+H                | 474.25  |
| Gentian Violet                    | M+K, M+2Na-<br>H               | 411.206 |
| Practolol                         | M+H, M+Na                      | 267.171 |

|                                                                |                                  |         |
|----------------------------------------------------------------|----------------------------------|---------|
| Tocainide                                                      | M+ACN+H                          | 234.16  |
| Rabeprazole                                                    | M+ACN+Na                         | 423.146 |
| Dolutegravir                                                   | M+H                              | 420.138 |
| 5-Hydroxydantrolene                                            | M+ACN+H                          | 372.093 |
| Eflornithine                                                   | 2M+Na                            | 387.162 |
| Pargyline                                                      | 2M+K                             | 357.173 |
| Orphenadrine                                                   | M+ACN+H                          | 311.212 |
| Propofol glucuronide                                           | M+H-H <sub>2</sub> O             | 337.166 |
| Valganciclovir                                                 | M+H-H <sub>2</sub> O,<br>M+ACN+H | 337.163 |
| Prucalopride                                                   | M+H                              | 368.172 |
| Cyclandelate                                                   | M+H                              | 277.18  |
| meta-O-Dealkylated flecainide lactam                           | M+ACN+Na                         | 410.131 |
| Dienogest                                                      | M+H                              | 312.196 |
| Ethionamide sulphoxide                                         | M+H-H <sub>2</sub> O             | 165.048 |
| Flavoxate                                                      | M+H-H <sub>2</sub> O             | 374.176 |
| Carfentanil                                                    | 2M+3H <sub>2</sub> O+2H          | 408.237 |
| Ethylmorphine                                                  | M+ACN+Na                         | 377.185 |
| nor-Levomethadyl acetate                                       | M+ACN+Na                         | 403.236 |
| Risperidone                                                    | M+H-2H <sub>2</sub> O,<br>M+H    | 375.198 |
| Enoximone                                                      | 2M+K                             | 535.089 |
| 6-allyl-8b-Carboxy-ergoline                                    | 2M+K                             | 631.268 |
| Propafenone                                                    | M+ACN+H                          | 383.232 |
| 2-Hydroxydesogestrel                                           | M+K                              | 365.188 |
| Debrisoquine                                                   | M+H, 2M+K                        | 389.186 |
| Gestrinone                                                     | 2M+K                             | 655.318 |
| Cyclizine                                                      | M+2Na-H                          | 311.15  |
| Pirenzepine                                                    | M+H,<br>M+ACN+H                  | 352.178 |
| Ecabet                                                         | M+H-H <sub>2</sub> O             | 363.162 |
| Carbamazepine iminoquinone                                     | 2M+H                             | 415.144 |
| Levobetaxolol                                                  | M+ACN+Na                         | 371.232 |
| Metoprolol                                                     | M+Na                             | 290.173 |
| Dronabinol                                                     | M+H                              | 315.232 |
| 3'-Azido-3'-deoxy-5'- O-beta-D-<br>glucopyranuronosylthymidine | M+Na                             | 466.119 |
| Propoxyphene                                                   | M+ACN+Na                         | 403.236 |
| Fimasartan                                                     | M+Na                             | 524.219 |
| N-Desmethyl sildenafil (UK-103,320)                            | M+H,<br>M+ACN+H                  | 461.198 |
| Nafcillin                                                      | M+ACN+Na                         | 478.139 |
| Trimipramine                                                   | 2M+H                             | 589.429 |
| Zolmitriptan                                                   | M+H-H <sub>2</sub> O             | 270.16  |

|                                            |                                             |                                                        |         |
|--------------------------------------------|---------------------------------------------|--------------------------------------------------------|---------|
|                                            | Forasartan                                  | M+Na                                                   | 439.232 |
|                                            | Flurandrenolide                             | M+ACN+H                                                | 478.261 |
|                                            | Hydroxystilbamidine Isethionate             | M+Na                                                   | 555.119 |
|                                            | Alfacalcidol                                | M+H                                                    | 401.341 |
|                                            | Trospium                                    | M+ACN+H                                                | 434.258 |
| <b>Fatty acids<br/>and<br/>derivatives</b> | Lonchocarpol B                              | M+H+Na                                                 | 233.098 |
|                                            | 3-Methylcrotonylglycine                     | M+H-2H <sub>2</sub> O                                  | 122.06  |
|                                            | 16,16-dimethyl-Prostaglandin A <sub>2</sub> | M+K                                                    | 401.207 |
|                                            | Dichotellate A                              | M+ACN+H                                                | 460.34  |
|                                            | 3,6,9-Hexadecatriene                        | M+2Na-H                                                | 265.19  |
|                                            | 2-ene-Valproic acid                         | M+H-2H <sub>2</sub> O                                  | 107.085 |
|                                            | 3Z-Undecene-5,7,10-triynoic acid            | M+ACN+H                                                | 214.087 |
|                                            | 15-oxo-18Z-tetracosenoic acid               | M+H-2H <sub>2</sub> O,<br>2M+3H <sub>2</sub> O+2H      | 444.345 |
|                                            | 8E-Heptadecenedioic acid                    | M+ACN+H                                                | 340.247 |
|                                            | 5,7,9,11,13-tetradecapentaenoic acid        | 2M+K                                                   | 475.224 |
|                                            | 2-keto palmitic acid                        | M+ACN+H                                                | 312.252 |
|                                            | Caproylcholine                              | M+K                                                    | 241.143 |
|                                            | 2-mercapto-octadecanoic acid                | M+K                                                    | 355.206 |
|                                            | Tridecanedioic acid                         | M+H-2H <sub>2</sub> O                                  | 209.153 |
|                                            | 2-Hydroxymyristic acid                      | M+H-H <sub>2</sub> O                                   | 227.2   |
|                                            | 9,12,13-TriHOME                             | M+H-2H <sub>2</sub> O,<br>M+ACN+Na                     | 295.226 |
|                                            | 6E,12E-octadecadienoic acid                 | M+H-2H <sub>2</sub> O                                  | 245.225 |
|                                            | Trans-Hexa-dec-2-enoic acid                 | M+H-H <sub>2</sub> O,<br>M+H                           | 237.22  |
|                                            | 9-Oxoctadecanoic acid                       | M+H-2H <sub>2</sub> O,<br>M+H-H <sub>2</sub> O,<br>M+H | 281.247 |
|                                            | Stearidonic acid                            | M+H                                                    | 277.215 |
|                                            | 5,8,12-Trihydroxy-9-octadecenoic acid       | M+H-2H <sub>2</sub> O                                  | 295.226 |
|                                            | 3-Hydroxyisovaleric acid                    | 2M+ACN+Na                                              | 300.141 |
|                                            | Stearolic acid                              | M+H-2H <sub>2</sub> O,<br>M+H-H <sub>2</sub> O,<br>M+H | 263.236 |
|                                            | 11-Oxoctadecanoic acid                      | M+Na                                                   | 321.239 |
|                                            | 6R-hydroxy-tetradecanoic acid               | M+ACN+H                                                | 286.237 |
|                                            | 2,4-dimethyl-2E-tetradecenoic acid          | M+H                                                    | 255.232 |
|                                            | Linoelaidic acid                            | M+H-2H <sub>2</sub> O,<br>M+H-H <sub>2</sub> O,<br>M+H | 281.246 |
|                                            | 3-hydroxypalmitic acid methyl ester         | M+H-2H <sub>2</sub> O,<br>M+K                          | 325.227 |

|                                      |                                                        |         |
|--------------------------------------|--------------------------------------------------------|---------|
| 9-keto palmitic acid                 | M+ACN+H                                                | 312.254 |
| 2Z-octadecenoic acid                 | M+ACN+H                                                | 324.289 |
| Isobutyryl-L-carnitine               | M+Na,<br>2M+3H <sub>2</sub> O+2H                       | 254.144 |
| Pinolenic acid                       | M+H                                                    | 279.232 |
| 11-keto palmitic acid                | M+H-2H <sub>2</sub> O                                  | 235.205 |
| 15-oxo-11Z,13E-eicosadienoic acid    | M+H                                                    | 323.258 |
| (R)-3-Hydroxy-hexadecanoic acid      | M+ACN+H                                                | 314.268 |
| Stearic acid                         | M+ACN+H                                                | 326.305 |
| 9-heptadecylenic acid                | M+H-H <sub>2</sub> O,<br>M+H, 2M+Na                    | 269.247 |
| Alpha-Linolenic acid                 | M+H                                                    | 279.232 |
| Palmitoleic acid                     | M+H                                                    | 255.231 |
| Gamma-Linolenic acid                 | M+H                                                    | 279.231 |
| Pentadecanedioic acid                | 2M+H                                                   | 545.404 |
| 4E,8E-octadecadienoic acid           | M+H-2H <sub>2</sub> O,<br>M+H-H <sub>2</sub> O,<br>M+H | 263.236 |
| 16-methyl-5Z,9Z-octadecadienoic acid | M+H                                                    | 295.262 |
| Malvalic acid                        | M+H-2H <sub>2</sub> O                                  | 245.225 |
| 5,8,11-Eicosatrienoic acid           | M+H                                                    | 307.263 |
| Linoleic acid                        | M+H-2H <sub>2</sub> O,<br>M+H-H <sub>2</sub> O,<br>M+H | 263.236 |
| 7,10,13-Eicosatrienoic acid          | M+H                                                    | 307.262 |
| (Z)-9-Heptadecenoic acid             | M+H-H <sub>2</sub> O,<br>M+H                           | 251.236 |
| DL-7-hydroxy stearic acid            | M+ACN+H                                                | 342.299 |
| 10-oxo-nonadecanoic acid             | M+H, M+Na,<br>M+ACN+H                                  | 354.297 |
| 2-methyl nonaonic acid               | M+H-2H <sub>2</sub> O                                  | 137.132 |
| 13-Docosenoic acid                   | M+ACN+H                                                | 380.352 |
| 15Z-octadecenoic acid                | M+H-2H <sub>2</sub> O,<br>M+H-H <sub>2</sub> O,<br>M+H | 265.252 |
| Heptadecanoic acid                   | M+H-2H <sub>2</sub> O                                  | 235.241 |
| Mycolipanic acid (C28)               | M+ACN+H                                                | 482.457 |
| 4-methyl-undecanoic acid             | 2M+K                                                   | 439.32  |
| 5Z,15Z-eicosadienoic acid            | M+H-H <sub>2</sub> O,<br>M+H                           | 309.278 |
| 20-hydroxy-eicosanoic acid           | M+ACN+H                                                | 370.332 |
| omega-hydroxy behenic                | M+ACN+H                                                | 398.362 |

|                               |                                                                                                                                                |                                                            |         |
|-------------------------------|------------------------------------------------------------------------------------------------------------------------------------------------|------------------------------------------------------------|---------|
|                               | 2-hydroxy-heneicosanoic acid                                                                                                                   | M+Na,<br>M+ACN+H,<br>M+ACN+Na                              | 384.346 |
|                               | 7-methyl caprylic acid                                                                                                                         | M+H-2H <sub>2</sub> O                                      | 123.116 |
|                               | 18-oxo-nonadecanoic acid                                                                                                                       | M+H                                                        | 313.273 |
| <b>Lipids and derivatives</b> | ar-Artemisene                                                                                                                                  | M+2Na-H                                                    | 315.206 |
|                               | (20S,22E)-3 $\beta$ -Hydroxy-5 $\alpha$ -chol-22-en-24-oic Acid                                                                                | M+ACN+H                                                    | 416.316 |
|                               | 1 $\alpha$ ,25-dihydroxy-21-norvitamin D3 / 1 $\alpha$ ,25-dihydroxy-21-norcholecalciferol                                                     | M+ACN+H                                                    | 444.346 |
|                               | 2-ethylacryloylcarnitine                                                                                                                       | M+H-2H <sub>2</sub> O,<br>M+H, M+Na                        | 266.15  |
|                               | (11Z,14Z)-eicosadienoylcarnitine                                                                                                               | M+H-2H <sub>2</sub> O                                      | 416.353 |
|                               | (+)-Vulgraon B                                                                                                                                 | M+2Na-H                                                    | 261.159 |
|                               | Demethyltorosaflavone C                                                                                                                        | M+2H, M+Na                                                 | 198.042 |
|                               | LysoSM(d18:1)                                                                                                                                  | M+H-2H <sub>2</sub> O                                      | 430.332 |
|                               | (9Z,12Z,15Z)-3-hydroxyoctadecatrienoylcarnitine                                                                                                | M+H-2H <sub>2</sub> O                                      | 402.299 |
|                               | (5Z)-(3S)-1 $\alpha$ ,25-dihydroxy-3-deoxy-3-thiavitamin D3 3-oxide / (5Z)-(3S)-1 $\alpha$ ,25-dihydroxy-3-deoxy-3-thiacholecalciferol 3-oxide | M+H                                                        | 435.293 |
|                               | dodecanamide                                                                                                                                   | M+H                                                        | 200.2   |
|                               | Isopetasoside                                                                                                                                  | M+H                                                        | 397.222 |
|                               | (4Z,9a)-9-Angeloyloxy-4,10(14)-oplopadien-3-one                                                                                                | M+K                                                        | 355.167 |
|                               | N-(3-oxo-hexanoyl)-homoserine lactone                                                                                                          | M+Na                                                       | 178.086 |
|                               | (+)-Hirusten-12-oic acid                                                                                                                       | M+H                                                        | 281.138 |
|                               | 13-(beta-D-glucosyloxy)docosanoic acid                                                                                                         | M+H-2H <sub>2</sub> O,<br>M+2Na-H                          | 483.369 |
|                               | N-(2E,4E,10E,12Z-tetradecatetraen-8-yn-oyl)isobutylamine                                                                                       | M+2Na-H                                                    | 316.165 |
|                               | 4,5-Dihydroniveusin A                                                                                                                          | M+H-2H <sub>2</sub> O                                      | 361.165 |
|                               | Deacetylisovaltrate                                                                                                                            | M+H-2H <sub>2</sub> O                                      | 345.171 |
|                               | (R)-1-O-[b-D-Glucopyranosyl-(1->6)-b-D-glucopyranoside]-1,3-octanediol                                                                         | M+H-2H <sub>2</sub> O                                      | 435.223 |
|                               | LysoPE(15:0/0:0)                                                                                                                               | M+H-2H <sub>2</sub> O                                      | 404.258 |
|                               | N-stearoyl tyrosine                                                                                                                            | M+H-2H <sub>2</sub> O                                      | 412.323 |
|                               | 20S-Hydroxycholest-4-en-3,16-dione                                                                                                             | M+K                                                        | 453.277 |
|                               | Gibberellin A19                                                                                                                                | M+H-H <sub>2</sub> O                                       | 345.171 |
|                               | 1,2-dihexanoyl-sn-glycero-3-phosphate                                                                                                          | M+H-2H <sub>2</sub> O,<br>M+H-H <sub>2</sub> O,<br>M+ACN+H | 410.228 |
|                               | N-oleoyl phenylalanine                                                                                                                         | M+H-2H <sub>2</sub> O                                      | 394.309 |
|                               | N-stearoyl phenylalanine                                                                                                                       | M+H-2H <sub>2</sub> O                                      | 396.326 |
|                               | 6,7-Epoxy-3Z,9Z-tricosadiene                                                                                                                   | M+ACN+Na                                                   | 398.34  |
|                               | Tetranor-PGEM-d6                                                                                                                               | M+H                                                        | 333.181 |
|                               | 5,9-tetracosadienoic acid                                                                                                                      | M+ACN+Na                                                   | 428.351 |

|                                               |                             |         |
|-----------------------------------------------|-----------------------------|---------|
| 19-Nor-14-epi-23-yne-1,25 dihydroxyvitamin D3 | M+H-H2O                     | 383.296 |
| 2R-hydroxy-oleic acid                         | M+ACN+H                     | 340.284 |
| Arachidonoyl-EA(d8)                           | M+Na                        | 378.321 |
| PGE1-EA                                       | M+H                         | 398.29  |
| LMFA13010020                                  | M+H-2H2O                    | 539.433 |
| Capsidiol                                     | M+H                         | 237.184 |
| 3-Hydroxysintaxanthin                         | M+H-2H2O                    | 411.304 |
| N-heptanoyl-homoserine lactone                | M+H-2H2O                    | 178.122 |
| N-(2-fluro-ethyl) 2-methyl-arachidonoyl amine | M+K                         | 402.257 |
| Taurochenodesoxycholic acid                   | M+H-2H2O                    | 464.284 |
| 26,27-dinor-cholest-5-en-23-yn-3 $\beta$ -ol  | M+ACN+H                     | 396.326 |
| 2,6-Dimethyl-7-octene-1,6-diol 8-O-glucoside  | M+ACN+H                     | 376.234 |
| Annoglabin C                                  | M+Na                        | 429.223 |
| 8-Oxohexadecanoic acid                        | M+H-2H2O                    | 235.205 |
| Melleolide G                                  | M+ACN+H                     | 474.247 |
| 6,7-Dimethoxy-7-epirosmanol                   | M+ACN+H                     | 432.238 |
| Tetradecanoylcarnitine                        | M+2Na-H                     | 416.274 |
| C16 Sphinganine                               | M+H                         | 274.274 |
| 5,8,12-TriHOME(9)                             | M+H-2H2O                    | 295.225 |
| Xestoaminol C                                 | M+H                         | 230.247 |
| Lubiminol                                     | M+H-H2O,<br>M+Na            | 254.211 |
| N,N,N-trimethyl-sphingosine                   | M+ACN+Na                    | 406.352 |
| 1-Octylglycerol                               | 2M+ACN+H                    | 450.379 |
| terpentecin                                   | M+H-H2O                     | 347.185 |
| Prosopinine                                   | M+H                         | 288.252 |
| 24-keto-25dehydrocholestanol                  | M+ACN+H                     | 442.367 |
| 12S-HpEPE                                     | M+H-2H2O                    | 299.2   |
| Tetranor 12-HETE                              | M+H                         | 267.194 |
| MG(20:5(5Z,8Z,11Z,14Z,17Z)/0:0:0:0)           | M+H                         | 377.269 |
| 3-ketosphingosine                             | M+H-H2O                     | 280.263 |
| Cincassiol B                                  | M+H, M+Na                   | 423.198 |
| xi-7-Hydroxyhexadecanedioic acid              | M+H-2H2O                    | 267.194 |
| Annosquamosin A                               | M+H-2H2O                    | 327.231 |
| Etretinate                                    | M+H-H2O,<br>M+H             | 355.227 |
| 5,8-tetradecadienal                           | M+H-H2O,<br>M+H,<br>M+ACN+H | 209.189 |
| 12S,13R-EpOME                                 | M+H-H2O,<br>M+H             | 279.231 |
| (2E)-Dodecenoyl-CoA                           | M+ACN+H                     | 985.268 |
| 1a,1b-dihomo-PGD2                             | M+H-H2O,<br>M+ACN+H         | 422.261 |

|                                                                                                   |                                                        |         |
|---------------------------------------------------------------------------------------------------|--------------------------------------------------------|---------|
| Gibberellin A6                                                                                    | M+2Na-H                                                | 391.112 |
| Vulgarone A                                                                                       | M+H                                                    | 219.173 |
| (Z)-13-Oxo-9-octadecenoic acid                                                                    | M+H-H <sub>2</sub> O,<br>M+H                           | 279.231 |
| 12S-HHTrE                                                                                         | M+H                                                    | 281.212 |
| Penaresidin A                                                                                     | M+H                                                    | 330.3   |
| 2,5-dimethyl-2E-tridecenoic acid                                                                  | M+H-H <sub>2</sub> O,<br>M+H                           | 223.206 |
| 3,16-dihydroxypalmitic acid                                                                       | M+H-2H <sub>2</sub> O                                  | 253.215 |
| Lauroyl-EA                                                                                        | M+H-H <sub>2</sub> O,<br>M+H, M+Na                     | 244.226 |
| 1alpha,25-dihydroxy-24-nor-22-oxavitamin D3 /<br>1alpha,25-dihydroxy-24-nor-22-oxacholecalciferol | M+H                                                    | 405.3   |
| (9S,10E,12Z,15Z)-9-Hydroxy-10,12,15-octadecatrienoic<br>acid                                      | M+H-H <sub>2</sub> O                                   | 277.216 |
| 12R-HOME(10E)                                                                                     | M+H-2H <sub>2</sub> O,<br>M+H-H <sub>2</sub> O,<br>M+H | 299.257 |
| Sphinganine                                                                                       | M+H-H <sub>2</sub> O                                   | 284.294 |
| Enigmol                                                                                           | M+H                                                    | 302.305 |
| Phytocassane D                                                                                    | M+H                                                    | 317.211 |
| ( $\hat{\pm}$ )-Hydroxycitronellol                                                                | 2M+ACN+H                                               | 390.358 |
| Phytosphingosine                                                                                  | M+H                                                    | 318.3   |
| (8Z,d18:1) sphingosine                                                                            | M+H                                                    | 300.289 |
| 19-HOME(9Z)                                                                                       | M+H-2H <sub>2</sub> O,<br>M+H-H <sub>2</sub> O,<br>M+H | 281.247 |
| 2,4-Undecadiene-8,10-diynoic acid isobutylamide                                                   | 2M+H                                                   | 459.302 |
| 8-hydroxy-11Z-octadecen-9-ynoic acid                                                              | M+H-H <sub>2</sub> O,<br>M+H                           | 295.226 |
| PG(14:1(9Z)/0:0)                                                                                  | M+2H                                                   | 228.123 |
| 9Z,12Z,15Z-Octadecatrienal                                                                        | M+H-H <sub>2</sub> O                                   | 245.226 |
| 12-epi-12-D2t-IsoP                                                                                | M+H-2H <sub>2</sub> O                                  | 317.212 |
| 10E,12E,14E-Hexadecatrienal                                                                       | M+H                                                    | 235.205 |
| 3-Methylpentadecan-2-one                                                                          | M+ACN+H                                                | 282.279 |
| Ginsenoine K                                                                                      | M+H                                                    | 277.18  |
| 3-Dehydrosphinganine                                                                              | M+H                                                    | 300.289 |
| 3alpha,7alpha,12alpha,25-Tetrahydroxy-5beta-cholestane-<br>24-one                                 | M+H-2H <sub>2</sub> O                                  | 415.32  |
| (9R,13R)-10-oxo-11-phytoenoic acid                                                                | M+H-H <sub>2</sub> O,<br>M+H                           | 277.216 |
| (E)-3-decen-1-ol                                                                                  | 2M+ACN+H                                               | 354.336 |
| (E)-2-Octen-1-ol                                                                                  | 2M+Na                                                  | 279.23  |
| Prostaglandin F1a                                                                                 | M+H-2H <sub>2</sub> O                                  | 321.241 |

|                                                                                                                              |                                           |         |
|------------------------------------------------------------------------------------------------------------------------------|-------------------------------------------|---------|
| 1,2-dimethylcyclopentane                                                                                                     | 2M+Na                                     | 219.208 |
| (2'E,4'Z,8E)-Colneleic acid                                                                                                  | M+H-H <sub>2</sub> O,<br>M+Na             | 277.216 |
| LysoSM(d18:0)                                                                                                                | M+H, M+Na                                 | 489.342 |
| (4E,8E,10E-d18:3)sphingosine                                                                                                 | M+H                                       | 296.258 |
| LMFA11000660                                                                                                                 | 2M+Na                                     | 219.209 |
| N,N-dimethyl-Safingol                                                                                                        | M+H-H <sub>2</sub> O                      | 312.325 |
| (9S,13S)-10-oxo-11-phytoenoic acid                                                                                           | M+H-H <sub>2</sub> O,<br>M+H              | 295.226 |
| 1,5Z-Octadien-3-ol                                                                                                           | 2M+H                                      | 253.216 |
| 14S-Methyl-1-octadecene                                                                                                      | M+ACN+H                                   | 308.331 |
| Glycerol tributanoate                                                                                                        | M+H-H <sub>2</sub> O,<br>M+H              | 303.18  |
| Pentadecanoyl-EA                                                                                                             | M+H-H <sub>2</sub> O,<br>M+H              | 286.274 |
| Geranyl hexanoate                                                                                                            | M+H-H <sub>2</sub> O,<br>M+H              | 235.205 |
| (9S,13S)-10,11-dihydro-12-oxo-15-phytoenoic acid                                                                             | M+H-H <sub>2</sub> O,<br>M+H,<br>2M+ACN+H | 277.215 |
| Methyl (3x,10R)-dihydroxy-11-dodecene-6,8-diyanoate 10-glucoside                                                             | M+Na                                      | 421.145 |
| 5β-Cholane-3α,7α,12α-triol                                                                                                   | M+Na                                      | 401.303 |
| Stearaldehyde                                                                                                                | M+ACN+H                                   | 310.311 |
| 18-Nor-4(19),8,11,13-abietatetraene                                                                                          | M+H                                       | 255.21  |
| punaglandin 7                                                                                                                | M+H                                       | 439.189 |
| Epinepetalactone                                                                                                             | M+H-2H <sub>2</sub> O                     | 131.085 |
| PS(17:1(9Z)/22:0)                                                                                                            | M+Na                                      | 854.585 |
| PE(19:0cycv8c/17:0cycw7c)                                                                                                    | M+Na                                      | 766.533 |
| PG(19:iso/12:0)                                                                                                              | M+ACN+H                                   | 750.531 |
| 1-hexadecyl-2-palmitoyl-glycero-3-phosphoethanolamine                                                                        | M+2Na-H                                   | 722.506 |
| Dehydroandrosterone                                                                                                          | 2M+ACN+H                                  | 618.454 |
| PGF2alpha isopropyl ester                                                                                                    | M+Na                                      | 419.277 |
| DG(10:0/10:0/0:0)                                                                                                            | M+ACN+H                                   | 442.351 |
| Kurilensoside F                                                                                                              | M+H-2H <sub>2</sub> O                     | 595.383 |
| DG(10:0/10:0(3-OH)/0:0)                                                                                                      | M+ACN+H                                   | 458.347 |
| (25S)-5α-cholestan-3β,4β,6α,8β,15α,16β,26-heptol                                                                             | M+Na                                      | 507.33  |
| 12-Methyltridecanal                                                                                                          | M+ACN+H                                   | 254.247 |
| Palmitaldehyde                                                                                                               | M+Na                                      | 263.235 |
| Catalpol                                                                                                                     | M+ACN+Na                                  | 426.137 |
| Penazetidine A                                                                                                               | M+ACN+Na                                  | 433.378 |
| 26,27-diethyl-1alpha,25-dihydroxy-22-thia-20-epivitamin D3 / 26,27-diethyl-1alpha,25-dihydroxy-22-thia-20-epicholecalciferol | M+H-H <sub>2</sub> O                      | 473.345 |

|                                                                                                                                                  |            |         |
|--------------------------------------------------------------------------------------------------------------------------------------------------|------------|---------|
| Tetradecanal                                                                                                                                     | M+ACN+H    | 254.247 |
| 5'-O-Methylmelledonal                                                                                                                            | M+K,       | 485.158 |
|                                                                                                                                                  | M+ACN+H    |         |
| meso-Pristane                                                                                                                                    | M+ACN+H    | 310.347 |
| 1alpha,25-dihydroxy-26,27-dimethyl-24a-homo-22-thia-20-epivitamin D3 / 1alpha,25-dihydroxy-26,27-dimethyl-24a-homo-22-thia-20-epicholecalciferol | 2M+3H2O+2H | 490.344 |
| (22E, 24x)-Ergosta-4,6,8,22-tetraen-3-one                                                                                                        | 2M+ACN+Na  | 848.629 |
| Tetranor-PGF1alpha                                                                                                                               | M+ACN+Na   | 364.21  |
| LysoPE(18:0/0:0)                                                                                                                                 | M+H        | 482.323 |
| Serratamic acid                                                                                                                                  | 2M+3H2O+2H | 289.184 |
| PA(13:0/12:0)                                                                                                                                    | M+2Na      | 298.171 |
| N-(tetradecanoyl)-deoxysphing-4-enine-1-sulfonate                                                                                                | M+H-H2O    | 556.442 |
| 1,3-dipentadecanoyl-2-hydroxy-glycerol (d5)                                                                                                      | M+K        | 584.47  |
| 1alpha-fluoro-25-hydroxy-16,17,23,23,24,24-hexadehydrovitamin D3 / 1alpha-fluoro-25-hydroxy-16,17,23,23,24,24-hexadehydrocholecalciferol         | M+H, M+Na  | 413.284 |
| (25R)-26,26,26-trifluoro-1alpha,25-dihydroxyvitamin D3 / (25R)-26,26,26-trifluoro-1alpha,25-dihydroxycholecalciferol                             | M+K        | 509.265 |
| 16,17-Dihydro-16a,17-dihydroxygibberellin A7 17-glucoside                                                                                        | M+K        | 565.17  |
| Corchoionol C 9-glucoside                                                                                                                        | M+2Na-H    | 431.166 |
| Vetiverol                                                                                                                                        | M+H-H2O,   | 221.189 |
|                                                                                                                                                  | M+H        |         |
| Calcidiol                                                                                                                                        | M+H-H2O,   | 383.33  |
|                                                                                                                                                  | 2M+K       |         |
| Dihydrophytol                                                                                                                                    | M+ACN+H    | 340.357 |
| 1alpha,25-dihydroxy-24a-homo-22-thia-20-epivitamin D3 / 1alpha,25-dihydroxy-24a-homo-22-thia-20-epicholecalciferol                               | M+H-2H2O   | 413.287 |
| 13S-hydroxyoctadecadienoic acid                                                                                                                  | M+H-H2O    | 279.231 |
| Panaxatriol                                                                                                                                      | M+ACN+Na   | 540.402 |
| 2-amino-14,16-dimethyloctadecan-3-ol                                                                                                             | M+H        | 314.341 |
| 9S,11R,15S-trihydroxy-2,3-dinor-13E-prostaenoic acid-cyclo[8S,12R]                                                                               | M+K        | 367.188 |
| cyasterone                                                                                                                                       | M+H-2H2O   | 485.289 |
| DG(10:0(3-OH)/12:0(3-OH)/0:0)                                                                                                                    | M+ACN+H    | 502.372 |
| PA(18:4(6Z,9Z,12Z,15Z)/0:0)                                                                                                                      | M+H-H2O    | 413.208 |
| Campestanol                                                                                                                                      | M+H-2H2O   | 367.371 |
| Miltirone                                                                                                                                        | M+H        | 283.169 |
| Isorenieratene/ (Leprotene)                                                                                                                      | M+ACN+Na   | 592.389 |
| 1-tridecanoyl-sn-glycero-3-phosphate                                                                                                             | M+Na       | 391.185 |
| 2-Octaprenyl-3-methyl-6-methoxy-1,4-benzoquinol                                                                                                  | M+K        | 603.417 |

|                                                                                                                                                                                          |                                            |         |
|------------------------------------------------------------------------------------------------------------------------------------------------------------------------------------------|--------------------------------------------|---------|
| Glycerol 1-octadecanoate                                                                                                                                                                 | M+K                                        | 397.272 |
| Cholic acid                                                                                                                                                                              | M+ACN+H                                    | 450.321 |
| 7-Dehydrodesmosterol                                                                                                                                                                     | M+H-H <sub>2</sub> O                       | 365.32  |
| Perilloside B                                                                                                                                                                            | M+H-H <sub>2</sub> O                       | 311.15  |
| Spirilloxanthin                                                                                                                                                                          | M+K                                        | 635.424 |
| 2-Decaprenyl-6-methoxyphenol                                                                                                                                                             | M+K                                        | 843.642 |
| TG(17:0/17:2(9Z,12Z)/18:4(6Z,9Z,12Z,15Z))[iso6]                                                                                                                                          | M+Na                                       | 873.697 |
| 5 $\alpha$ -Androst-3-en-17-one                                                                                                                                                          | 2M+K                                       | 583.392 |
| 1-(13Z,16Z-docosadienoyl)-glycero-3-phospho-(1'-sn-glycerol)                                                                                                                             | M+H                                        | 565.352 |
| Muricholic acid                                                                                                                                                                          | M+ACN+H                                    | 450.321 |
| Menthol                                                                                                                                                                                  | M+Na                                       | 179.141 |
| [6]-Gingerdiol 3,5-diacetate                                                                                                                                                             | M+ACN+H                                    | 422.253 |
| xi-p-Menth-3-ene                                                                                                                                                                         | M+Na                                       | 161.13  |
| 13,17,21-trimethyl-5Z,9Z,19Z-docosatrienoic acid                                                                                                                                         | M+Na                                       | 399.324 |
| MG(16:0/0:0/0:0)                                                                                                                                                                         | M+H-2H <sub>2</sub> O,<br>M+ACN+Na         | 295.262 |
| 5 $\alpha$ -Cholesta-8,24-dien-3-one                                                                                                                                                     | M+H-H <sub>2</sub> O                       | 365.32  |
| Cembrene                                                                                                                                                                                 | M+H                                        | 273.257 |
| CDP-DG(14:0/14:0)                                                                                                                                                                        | M+ACN+Na                                   | 961.467 |
| 1 $\alpha$ -hydroxy-18-(5-hydroxy-5-methyl-2-hexyloxy)-23,24,25,26,27-pentanorvitamin D3 / 1 $\alpha$ -hydroxy-18-(5-hydroxy-5-methyl-2-hexyloxy)-23,24,25,26,27-pentanorcholecalciferol | M+H-H <sub>2</sub> O,<br>M+Na,<br>M+ACN+Na | 439.32  |
| 13'-Carboxy-alpha-tocopherol                                                                                                                                                             | M+ACN+H                                    | 502.389 |
| Hydroxysintaxanthin 5,6-epoxide                                                                                                                                                          | M+H-2H <sub>2</sub> O                      | 427.3   |
| Butyl butyryllactate                                                                                                                                                                     | 2M+Na                                      | 455.262 |
| 2,3-Dinor-6-keto-prostaglandin F1 a                                                                                                                                                      | M+Na                                       | 365.193 |
| 1 $\alpha$ ,25-dihydroxy-11 $\alpha$ -[(1R)-oxiranyl]vitamin D3 / 1 $\alpha$ ,25-dihydroxy-11 $\alpha$ -[(1R)-oxiranyl]cholecalciferol                                                   | M+ACN+Na                                   | 522.357 |
| Cholesterol-5 $\beta$ -hydroperoxide                                                                                                                                                     | M+H-H <sub>2</sub> O                       | 401.34  |
| 1-eicosyl-glycero-3-phospho-(1'-myo-inositol)                                                                                                                                            | M+H-2H <sub>2</sub> O                      | 579.368 |
| 26-O-[[ $\beta$ -D-glucopyranosyl]-25R-furostan-3 $\beta$ ,22 $\alpha$ ,26-triol                                                                                                         | M+H                                        | 597.402 |
| 2E-Phytenal                                                                                                                                                                              | M+ACN+H                                    | 336.325 |
| DG(18:0/15:0/0:0)                                                                                                                                                                        | M+H-H <sub>2</sub> O                       | 565.518 |
| Corchoroside B                                                                                                                                                                           | M+H-2H <sub>2</sub> O                      | 647.345 |
| LBPA(16:0/18:1(9Z))                                                                                                                                                                      | M+H-2H <sub>2</sub> O                      | 713.508 |
| TG(22:4(7Z,10Z,13Z,16Z)/20:1(11Z)/18:4(6Z,9Z,12Z,15Z))                                                                                                                                   | M+H                                        | 957.792 |
| 1-Undecanol                                                                                                                                                                              | 2M+ACN+H                                   | 386.4   |
| 1-tetradecanoyl-glycero-3-phospho-(1'-sn-glycerol)                                                                                                                                       | M+H-2H <sub>2</sub> O                      | 421.235 |
| NeuAc $\alpha$ 2-3Gal $\beta$ -Cer(d18:1/24:1(15Z))                                                                                                                                      | M+H+Na                                     | 562.385 |

|                                                                                                                                    |                                   |         |
|------------------------------------------------------------------------------------------------------------------------------------|-----------------------------------|---------|
| Archaetidylglycerol-(glycosyl)-myo-inositol                                                                                        | M+H+Na                            | 540.373 |
| 11alpha-(4-dimethylaminophenyl)-1alpha,25-dihydroxyvitamin D3 / 11alpha-(4-dimethylaminophenyl)-1alpha,25-dihydroxycholecalciferol | 2M+3H <sub>2</sub> O+2H           | 549.412 |
| MG(0:0/22:2(13Z,16Z)/0:0)                                                                                                          | M+H                               | 411.346 |
| 1-hexadecanoyl-sn-glycero-3-phospho-(1'-sn-glycerol)                                                                               | M+2H                              | 243.148 |
| (25S)-5alpha-cholestan-3beta,6alpha,7beta,8beta,15alpha,16beta,26-heptol                                                           | M+H, 2M+H                         | 969.671 |
| Trihydroxycoprostanic acid                                                                                                         | M+ACN+H                           | 506.383 |
| Ganoderic acid Mf                                                                                                                  | M+H-H <sub>2</sub> O              | 495.347 |
| Cholesta-4,6-dien-3-one                                                                                                            | M+H-H <sub>2</sub> O              | 365.32  |
| 2,6,14-trimethyl-10-methylene-9-(3-methylpent-4-enyl)-pentadec-6E-ene                                                              | M+2Na-H                           | 391.331 |
| Glycerol triundecanoate                                                                                                            | M+H                               | 597.509 |
| 4b-Hydroxycholesterol                                                                                                              | M+H-2H <sub>2</sub> O             | 367.336 |
| Fuopirostane skeleton                                                                                                              | M+H-2H <sub>2</sub> O             | 365.321 |
| Cer(d18:0/20:0)                                                                                                                    | M+H                               | 596.598 |
| DG(22:6(4Z,7Z,10Z,13Z,16Z,19Z)/22:6(4Z,7Z,10Z,13Z,16Z,19Z)/0:0)                                                                    | M+H-2H <sub>2</sub> O             | 677.496 |
| Elaterinide                                                                                                                        | M+ACN+H                           | 760.393 |
| Pisumoside A                                                                                                                       | M+2Na-H                           | 899.347 |
| PG(14:0/16:0)                                                                                                                      | 2M+3H <sub>2</sub> O+2H           | 708.489 |
| CL(18:0/18:0/16:1(9Z)/16:1(9Z))                                                                                                    | M+2H                              | 703.51  |
| PS(12:0/22:2(13Z,16Z))                                                                                                             | M+H                               | 760.515 |
| 24:2(5Z,9Z)(11Me,15Me,19Me,23Me)                                                                                                   | M+Na                              | 443.387 |
| Minabeolide-5                                                                                                                      | M+H-H <sub>2</sub> O              | 437.267 |
| 5-Androstenetriol                                                                                                                  | M+H-2H <sub>2</sub> O             | 271.205 |
| 1-(9Z-tetradecenoyl)-2-(9Z-pentadecenoyl)-glycero-3-phosphoserine                                                                  | M+2Na-H                           | 734.4   |
| Glycerol 2-(9Z,12Z-octadecadienoate) 1-hexadecanoate 3-O-[alpha-D-galactopyranosyl-(1->6)-beta-D-galactopyranoside]                | M+ACN+H                           | 958.646 |
| MG(0:0/16:0/0:0)                                                                                                                   | M+H-H <sub>2</sub> O              | 313.273 |
| 2'-O-(alpha-D-Manp)-(1-(9Z,12Z-octadecadienoyl)-sn-glycero-3-phospho-1'-myo-inositol)                                              | M+ACN+H                           | 800.385 |
| 15-Hentriacontanol                                                                                                                 | M+2Na-H                           | 497.467 |
| (3beta,5alpha,6beta,9alpha,22E,24R)-23-Methylergosta-7,22-diene-3,5,6,9-tetrol                                                     | M+H                               | 461.363 |
| 1,2-di-(11Z-docosenoyl)-sn-glycero-3-phospho-(1'-sn-glycerol)                                                                      | M+H, M+2H, M+Na, M+H+Na           | 909.65  |
| N-(9Z-octadecenoyl)-tetradecasphing-4-ene                                                                                          | M+H                               | 508.471 |
| Thromboxane B2                                                                                                                     | M+ACN+Na, 2M+3H <sub>2</sub> O+2H | 434.258 |
| 24S,25-dihydroxycholesterol                                                                                                        | M+H-H <sub>2</sub> O              | 401.341 |

|                                              |                                                 |                                      |         |
|----------------------------------------------|-------------------------------------------------|--------------------------------------|---------|
|                                              | Glycerol 1,3-didodecanoate 2-decanoate          | M+H                                  | 611.525 |
|                                              | Ubiquinone-1                                    | M+H-2H <sub>2</sub> O                | 215.105 |
|                                              | DG(10:0/15:0/0:0)                               | M+H-H <sub>2</sub> O,<br>M+H, M+Na   | 453.393 |
|                                              | Cer(d18:0/12:0)                                 | M+H                                  | 484.471 |
|                                              | 9-Hexadecenoylcarnitine                         | M+ACN+H                              | 439.353 |
|                                              | phorbol 13-acetate 12-myristate                 | M+H-2H <sub>2</sub> O                | 581.386 |
| <b>Organic acids<br/>and<br/>derivatives</b> | L-2,3-Dihydrodipicolinate                       | 2M+3H <sub>2</sub> O+2H,<br>2M+ACN+H | 183.048 |
|                                              | 4'-phosphopantetheine                           | M+2Na                                | 200.04  |
|                                              | 2-Oxosuccinamate                                | M+Na                                 | 154.011 |
|                                              | Isobutyl isobutyrate                            | M+H-2H <sub>2</sub> O,<br>M+ACN+Na   | 208.132 |
|                                              | Acetaminophen cystein                           | M+H-H <sub>2</sub> O                 | 237.069 |
|                                              | Neoherculin                                     | M+ACN+Na                             | 311.21  |
|                                              | (R)-3-Hydroxy-5-phenylpentanoic acid            | M+H-2H <sub>2</sub> O                | 159.08  |
|                                              | 3-Sulfinoalanine                                | M+ACN+H                              | 194.035 |
|                                              | Anofinic acid                                   | M+ACN+H                              | 246.112 |
|                                              | Ergothioneine                                   | M+ACN+Na                             | 293.105 |
|                                              | Hydrogen carbonate                              | 2M+ACN+H                             | 164.019 |
|                                              | Î <sup>2</sup> -D-glucose 6-phosphate           | M+H-2H <sub>2</sub> O                | 221.02  |
|                                              | N-Lauroylglycine                                | M+Na                                 | 280.188 |
|                                              | Palmitoylglycine                                | M+H                                  | 314.269 |
|                                              | Artemisyl propionate                            | M+H                                  | 211.168 |
|                                              | S-(3-Methyl-2-butenyl) 2-methylpropanethioate   | M+ACN+H                              | 214.125 |
|                                              | Dihydroceramide                                 | M+H                                  | 330.3   |
|                                              | N1,N8-Diacetylspermidine                        | M+ACN+H                              | 272.221 |
|                                              | Tricosanoylglycine                              | M+2Na-H                              | 456.343 |
|                                              | N2-(2-Carboxymethyl-2-hydroxysuccinoyl)arginine | M+ACN+H                              | 390.162 |
|                                              | Domoic acid                                     | M+ACN+H                              | 353.172 |
|                                              | Argininic acid                                  | 2M+ACN+Na                            | 414.207 |
|                                              | 2,4-Hexadienyl acetate                          | M+H-2H <sub>2</sub> O                | 105.069 |
|                                              | Dopaxanthin quinone                             | M+ACN+Na                             | 452.105 |
|                                              | L-glycyl-L-hydroxyproline                       | 2M+ACN+H                             | 418.193 |
|                                              | Acetyl tributyl citrate                         | M+H                                  | 403.232 |
|                                              | Neuromedin N                                    | M+H-2H <sub>2</sub> O                | 582.364 |
| Fumonisin A2                                 | M+H                                             | 748.411                              |         |
| Mytilin A                                    | M+2Na-H                                         | 377.093                              |         |
| Na-Hexanoyl-Nb-inosityltryptophan            | M+2Na-H                                         | 509.186                              |         |
| <b>Organic<br/>compounds</b>                 | Methyl bisnorbiotinyl ketone                    | M+H-2H <sub>2</sub> O                | 179.063 |
|                                              | 3-Amino-1,4-dimethyl-5H-pyrido[4,3-b]indole     | M+H                                  | 212.117 |
|                                              | Lactarofulvene                                  | M+2Na-H                              | 241.096 |
|                                              | Gamma-glutamyl-L-putrescine                     | M+Na                                 | 240.132 |

|                                                                                            |                                       |         |
|--------------------------------------------------------------------------------------------|---------------------------------------|---------|
| 1,3-Octadiene                                                                              | M+2Na-H                               | 155.08  |
| 1-Dodecene                                                                                 | M+2Na-H                               | 213.158 |
| N-trans-p-Coumaroyloctopamine                                                              | M+Na, M+K,<br>M+ACN+Na                | 338.08  |
| Oxalureate                                                                                 | 2M+ACN+Na                             | 328.051 |
| Marshdine                                                                                  | M+K                                   | 338.042 |
| Hexahydro-6,7-dihydroxy-5-(hydroxymethyl)-3-(2-hydroxyphenyl)-2H-pyrano[2,3-d]oxazol-2-one | M+2Na-H                               | 342.056 |
| Gomphidic acid                                                                             | M+H-H <sub>2</sub> O                  | 355.046 |
| N-Isobutyl-2,4,8-decatrienamide                                                            | M+2Na-H                               | 266.149 |
| (+)-1-Methylpropyl 3-(methylthio)-2-propenyl disulfide                                     | M+ACN+Na                              | 272.057 |
| Tetrahydrofurfuryl cinnamate                                                               | M+2Na                                 | 139.044 |
| 9-Azabicyclo[3.3.1]nonan-3-one                                                             | M+ACN+Na                              | 203.116 |
| Albafuran B                                                                                | M+2Na                                 | 212.081 |
| cyclic Melatonin                                                                           | M+H, M+Na                             | 231.112 |
| Neotame                                                                                    | M+H+Na                                | 201.106 |
| Isoeugenol benzyl ether                                                                    | M+ACN+Na                              | 318.146 |
| Medroxyprogesterone                                                                        | M+K                                   | 383.198 |
| Aflatoxin G2a                                                                              | M+Na                                  | 369.058 |
| (+/-)-N,N-Dimethyl menthyl succinamide                                                     | M+2Na-H                               | 213.159 |
| Harmol                                                                                     | M+ACN+H                               | 240.113 |
| 8-O-Methylolongine                                                                         | M+ACN+Na                              | 392.207 |
| S-Adenosylmethionine                                                                       | M+H-2H <sub>2</sub> O                 | 364.133 |
| Kanzonol F                                                                                 | M+H-2H <sub>2</sub> O                 | 385.179 |
| Hydroxypropyl cellulose                                                                    | M+H                                   | 266.081 |
| Neurine                                                                                    | M+ACN+Na                              | 167.116 |
| Vildagliptin                                                                               | M+H-H <sub>2</sub> O,<br>M+ACN+H      | 286.19  |
| N2-(gamma-Glutamyl)-4-carboxyphenylhydrazine                                               | M+ACN+H                               | 323.135 |
| 4-Ethyl-2-methoxyphenol                                                                    | 2M+Na                                 | 327.156 |
| m-Cymene                                                                                   | M+2Na-H                               | 207.112 |
| Nigellicine                                                                                | M+H-H <sub>2</sub> O                  | 229.097 |
| Urolithin A-3-O-glucuronide                                                                | M+H-2H <sub>2</sub> O                 | 369.061 |
| Carbinoxamine                                                                              | 2M+K                                  | 619.201 |
| 7-Hydroxy-2-methyl-4-oxo-4H-1-benzopyran-5-carboxylic acid 7-glucoside                     | M+2H                                  | 192.052 |
| Benzoyl glucuronide (Benzoic acid)                                                         | 2M+3H <sub>2</sub> O+2H,<br>2M+ACN+Na | 312.086 |
| Chalconaringenin 2'-rhamnosyl-(1->4)-glucoside                                             | M+2Na                                 | 313.078 |
| (2S,4R)-4-(9H-Pyrido[3,4-b]indol-1-yl)-1,2,4-butanetriol                                   | M+ACN+H                               | 314.15  |
| Pelargonidin 3-O-[2-O-(β-D-xylopyranosyl)-6-O-(methylmalonyl)-bata-D-galactopyranoside]    | M+2H                                  | 333.592 |
| Petunidin 3-rutinoside                                                                     | M+2Na-H                               | 670.149 |
| Benzyl methyl disulfide                                                                    | M+H, M+Na                             | 171.03  |

|                                                                |                         |         |
|----------------------------------------------------------------|-------------------------|---------|
| 3,4,17-trihydroxy-9,10-seco-androsta-1,3,5(10)-triene-9-one    | M+H                     | 319.19  |
| Isopropyl apiosylglucoside                                     | M+H-H <sub>2</sub> O    | 337.151 |
| 2-Propyl-2,4-pentadienoic acid                                 | M+H-2H <sub>2</sub> O   | 105.07  |
| (4-Hydroxy-3-methoxyphenyl)ethanol                             | M+H-2H <sub>2</sub> O   | 133.064 |
| 2,3,6,7-Tetrahydrocyclopent[b]azepin-8(1H)-one                 | M+H-H <sub>2</sub> O,   | 150.09  |
|                                                                | M+H                     |         |
| (4-Hydroxybenzoyl)choline                                      | M+K                     | 263.092 |
| 2-Heptylbenzothiazole                                          | M+K                     | 272.087 |
| 9-(beta-D-Ribofuranosyl)zeatin                                 | M+H                     | 352.16  |
| Methcathinone                                                  | 2M+ACN+H                | 368.232 |
| 3-Ethyl-1,2-cyclopentanedione                                  | M+H-2H <sub>2</sub> O   | 91.0545 |
| (6E,8E)-4,6,8-Megastigmatriene                                 | M+2Na-H                 | 221.127 |
| Subaphylline                                                   | M+H-H <sub>2</sub> O    | 247.144 |
| alpha-Hydrojuglone 4-O-b-D-glucoside                           | M+2Na-H                 | 383.07  |
| 3-Isopropyl-2-methoxy-5-methylpyrazine                         | M+H, M+Na,              | 230.128 |
|                                                                | M+ACN+Na                |         |
| 1,1-Dimethoxyoctane                                            | M+ACN+H                 | 216.195 |
| xi-1-Butoxy-1-methoxyethane                                    | 2M+ACN+H                | 306.263 |
| Koeniginequinone A                                             | M+ACN+H                 | 283.108 |
| (S)-5'-Deoxy-5'-(methylsulfinyl)adenosine                      | 2M+3H <sub>2</sub> O+2H | 327.095 |
| alpha-Hydroxy-1-methyl-1H-indole-3-propanoic acid              | M+Na                    | 242.08  |
| 4-Hydroxy-5-(3',5'-dihydroxyphenyl)-valeric acid-O-glucuronide | M+H                     | 403.122 |
| 2-Phenylethyl 2-aminobenzoate                                  | M+H                     | 242.117 |
| Toraseamide                                                    | M+Na,                   | 390.142 |
|                                                                | M+ACN+H                 |         |
| Mangostinone                                                   | M+ACN+H                 | 422.198 |
| 3-Acetylpyridine                                               | M+H                     | 122.06  |
| 4,5-Dimethyl-2-heptyloxazole                                   | M+ACN+Na                | 259.179 |
| Zanthosimuline                                                 | M+Na                    | 332.162 |
| 1-Deoxy-L-glycero-tetralose 4-phosphate                        | M+Na                    | 207.003 |
| 1-Phenyl-1,3-nonadecanedione                                   | M+ACN+H                 | 414.336 |
| Biphenyl                                                       | M+K                     | 193.042 |
| 3'-Deaminofusarochromanone                                     | M+H-2H <sub>2</sub> O   | 242.117 |
| 2-[(2-Furanylmethyl)thio]-6-methylpyrazine                     | M+H                     | 207.058 |
| 1,18-Diamino-5,9,14-triazaoctadecane                           | M+K                     | 326.268 |
| Ketophenylbutazone                                             | M+ACN+H                 | 364.166 |
| Methoxybrassinin                                               | M+H-2H <sub>2</sub> O   | 215.063 |
| 4-Hydroxybenzeneacetonitrile                                   | 2M+ACN+Na               | 330.122 |
| 4-(Î³-glutamylamino)butanal                                    | 2M+3H <sub>2</sub> O+2H | 229.116 |
| Zileuton                                                       | M+H                     | 237.069 |
| gamma-Glutamyl-gamma-butyraldehyde                             | M+Na                    | 239.1   |
| 4-Methyl-2-propyloxazole                                       | 2M+H                    | 251.174 |

|                                                                  |                                    |         |
|------------------------------------------------------------------|------------------------------------|---------|
| Amsacrine                                                        | M+H, M+K                           | 389.161 |
| 9H-Carbazole-3-carboxaldehyde                                    | 2M+Na                              | 413.126 |
| Sofalcone                                                        | M+H-2H <sub>2</sub> O,<br>M+H+Na   | 237.101 |
| N-Acetylserotonin                                                | M+H-H <sub>2</sub> O               | 201.102 |
| 3-Hydroxy-carbofuran                                             | M+H-2H <sub>2</sub> O              | 202.086 |
| Heptanoylcholine                                                 | M+2Na-H                            | 261.168 |
| Kamahine C                                                       | M+2Na-H                            | 313.101 |
| N6-cis-p-Coumaroylserotonin                                      | M+ACN+H                            | 364.166 |
| Propyl cinnamate                                                 | M+ACN+H,<br>2M+Na                  | 403.177 |
| 1,2,5,6-Tetrahydro-4H-pyrrolo[3,2,1-ij]quinolin-4-one            | M+ACN+H                            | 215.117 |
| 1,17-Diamino-4,9,13-triazaheptadecane                            | M+K                                | 312.253 |
| 4-Hydroxybenzyl isothiocyanate                                   | M+ACN+H                            | 207.058 |
| 2-(Methylthio)-3H-phenoxazin-3-one                               | M+ACN+H                            | 285.069 |
| Terodiline hydrochloride                                         | M+H-H <sub>2</sub> O               | 299.18  |
| 2-Phenyl-4-pentenal                                              | M+ACN+H                            | 202.122 |
| [10]-Dehydrogingerdione                                          | M+H-2H <sub>2</sub> O              | 311.199 |
| 14,19-Dihydroaspidospermatine                                    | M+H                                | 341.222 |
| 10,12-Heptacosanedione                                           | M+K                                | 447.36  |
| 3-Phenoxybenzoic acid                                            | M+H                                | 215.07  |
| 3-Methylcyclohexanol                                             | 2M+ACN+H                           | 270.242 |
| Erucoylacetone                                                   | M+ACN+Na                           | 442.366 |
| Acetal R                                                         | M+ACN+H                            | 250.18  |
| alpha-Butyl-omega-hydroxypoly(oxyethylene)<br>poly(oxypropylene) | M+Na                               | 271.187 |
| Pongamoside A                                                    | M+K                                | 479.075 |
| 3',4',5'-Trimethoxycinnamyl alcohol acetate                      | M+H, M+2Na-<br>H                   | 267.122 |
| 3,5-Di-O-methyl-8-prenylafzelechin-4beta-ol                      | M+K                                | 425.137 |
| 3-Methyl-5-pentyl-1,2,4-trithiolane                              | 2M+3H <sub>2</sub> O+2H            | 222.053 |
| Ethyl maltol                                                     | 2M+H                               | 281.102 |
| 4,5-Di-O-methyl-8-prenylafzelechin-4beta-ol                      | M+H-H <sub>2</sub> O,<br>M+H, M+Na | 387.18  |
| (+)-Setoclavine                                                  | M+H-H <sub>2</sub> O               | 237.138 |
| N-[(4-Hydroxy-3-methoxyphenyl)methyl]octanamide                  | M+H-H <sub>2</sub> O               | 262.18  |
| Cyclobassinin                                                    | M+H                                | 235.035 |
| 1,1-Diethoxypentane                                              | 2M+ACN+H                           | 362.326 |
| DG(14:0(3-OH)/17:0cycw7c/0:0)                                    | M+2Na-H                            | 613.441 |
| Batatasin III                                                    | M+ACN+H                            | 286.143 |
| 2-Pentyl-3-phenyl-2-propenal                                     | 2M+K                               | 443.234 |
| N,N,O-Tridesmethylvenlafaxine                                    | M+H-H <sub>2</sub> O               | 218.153 |
| 5-Methoxy-7,8-diprenylflavone                                    | M+Na                               | 411.194 |
| 12,14-Nonacosanedione                                            | M+K                                | 475.392 |

|                                                                                                             |                              |         |
|-------------------------------------------------------------------------------------------------------------|------------------------------|---------|
| Purpuritenin B                                                                                              | 2M+ACN+H                     | 626.256 |
| Cotinine methonium ion                                                                                      | M+Na,<br>M+ACN+H             | 233.153 |
| Nitecapone                                                                                                  | M+H                          | 266.067 |
| 2,5-Dibenzyl-3-hydroxy-6-methoxypyrazine                                                                    | M+H-2H <sub>2</sub> O        | 271.124 |
| 8,8-Diethoxy-2,6-dimethyl-2-octanol                                                                         | M+ACN+H                      | 288.253 |
| Lotaustralin                                                                                                | M+H-H <sub>2</sub> O         | 244.118 |
| Moringyne                                                                                                   | M+ACN+Na                     | 376.137 |
| Chondroitin D-glucuronate                                                                                   | 2M+ACN+Na                    | 882.333 |
| D8'-Merulinic acid C                                                                                        | M+H-H <sub>2</sub> O         | 357.278 |
| Oxybenzone                                                                                                  | M+H                          | 229.085 |
| Norambreinolide                                                                                             | M+H                          | 251.2   |
| 2-Pentadecanone                                                                                             | M+ACN+H                      | 268.263 |
| Deoxyeritadenine                                                                                            | M+H-H <sub>2</sub> O         | 220.083 |
| N-Desmethylaminopyrine                                                                                      | M+ACN+Na                     | 281.137 |
| (S)-(E)-8-(3,6-Dimethyl-2-heptenyl)-4',5,7-trihydroxyflavanone                                              | M+H                          | 397.201 |
| N5-Formyl-THF                                                                                               | M+2Na-H                      | 518.137 |
| Resolvin E1                                                                                                 | M+H-2H <sub>2</sub> O        | 315.195 |
| Kushenol P                                                                                                  | M+H                          | 457.222 |
| (2S,4S,6S)-2-[2-(4-Hydroxy-3-methoxyphenyl)ethyl]tetrahydro-6-(4,5-dihydroxy-3-methoxyphenyl)-2H-pyran-4-ol | M+2Na-H                      | 435.14  |
| Phenylethylamine                                                                                            | 2M+H                         | 243.185 |
| Cotinine glucuronide                                                                                        | M+ACN+Na                     | 416.143 |
| Neocrimarine B                                                                                              | M+H                          | 668.284 |
| Neocretanin                                                                                                 | M+K                          | 507.056 |
| Calomelanol B                                                                                               | M+H,<br>M+ACN+H              | 405.135 |
| Acetaldehyde hexyl isoamyl acetal                                                                           | M+ACN+H                      | 258.242 |
| 2-Heptadecanone                                                                                             | M+ACN+H                      | 296.257 |
| N1-trans-Feruloylagmatine                                                                                   | M+ACN+Na                     | 370.185 |
| (R)-Kanzonol Y                                                                                              | M+H+Na                       | 217.103 |
| Lipoyllysine                                                                                                | M+H-2H <sub>2</sub> O        | 299.125 |
| Memantine                                                                                                   | M+ACN+Na                     | 243.184 |
| Ethylene brassylate                                                                                         | M+H, M+2Na-<br>H             | 315.18  |
| Dehydrophytosphingosine                                                                                     | M+H-H <sub>2</sub> O         | 298.273 |
| heptadecanal                                                                                                | M+ACN+H                      | 296.295 |
| 1,1-Dimethoxynonane                                                                                         | M+ACN+H                      | 418.389 |
| Palmitoleoyl Ethanolamide                                                                                   | M+H-H <sub>2</sub> O,<br>M+H | 280.263 |
| Pteroside P                                                                                                 | M+2Na                        | 221.079 |

|                                                              |                                |         |
|--------------------------------------------------------------|--------------------------------|---------|
| D6-Ambrettolide                                              | M+H-H <sub>2</sub> O,<br>M+H   | 253.215 |
| Pteroside D                                                  | M+ACN+Na                       | 474.21  |
| Cycloartomunoxanthone                                        | M+Na,<br>M+ACN+H               | 490.159 |
| 1-Nonadecene                                                 | M+ACN+H                        | 308.331 |
| 5-Methoxy-7,8-methylenedioxyflavone                          | M+2H                           | 149.041 |
| Deoxythymidine diphosphate-1-rhamnose                        | M+H                            | 549.087 |
| Harmanine                                                    | 2M+Na                          | 419.148 |
| 4-Hydroxydiphenylamine                                       | 2M+H                           | 371.175 |
| Longicaudatin                                                | M+H                            | 447.143 |
| 1-Octene                                                     | 2M+Na                          | 247.24  |
| 9Z-Nonadecene                                                | M+ACN+H                        | 308.33  |
| 3Z,6Z,9Z-Heneicosatriene                                     | M+ACN+H                        | 332.331 |
| decanamide                                                   | 2M+K                           | 381.289 |
| 9'-Carboxy-gamma-chromanol                                   | 2M+ACN+H                       | 794.557 |
| Nonoxynol-9                                                  | M+Na                           | 639.409 |
| 10,12-Tritriacontanedione                                    | M+K                            | 531.452 |
| 1-Methoxy-3-(4-hydroxyphenyl)-2E-propenal 4'-glucoside       | M+ACN+H                        | 368.171 |
| 1,1'-Bis(2-hydroxy-3-methylcarbazole)                        | M+ACN+H                        | 434.188 |
| Delphinidin 3-(acetylglucoside)                              | M+2Na-H                        | 552.087 |
| (5alpha,8beta,9beta)-5,9-Epoxy-3,6-megastigmadien-8-ol       | M+H-2H <sub>2</sub> O,<br>2M+H | 417.301 |
| 3-Hydroxyphenanthrene                                        | 2M+Na                          | 411.136 |
| 4-Hydroxyphenanthrene                                        | 2M+ACN+Na                      | 452.161 |
| Terbinafine                                                  | M+ACN+Na                       | 355.214 |
| 10-Methyltridecan-2-one                                      | M+Na                           | 235.203 |
| 2S-Hydroxyoctan-3-one                                        | M+H-2H <sub>2</sub> O          | 109.101 |
| shikimate 3-phosphate                                        | M+Na                           | 273.985 |
| 7-Hydroxy-3',4'-methylenedioxyflavan 7-O-β-D-glucopyranoside | M+2Na-H                        | 477.113 |
| 5-Acetylamino-6-formylamino-3-methyluracil                   | 2M+Na                          | 475.128 |
| Glycineamideribotide                                         | M+H-2H <sub>2</sub> O          | 251.042 |
| [12]-Gingerol                                                | M+Na                           | 401.266 |
| Kanzonol N                                                   | M+ACN+Na                       | 448.173 |
| Benzyl cinnamate                                             | 2M+Na                          | 499.187 |
| Nonadecane                                                   | M+ACN+H                        | 310.346 |
| Tridecanamide                                                | M+H-H <sub>2</sub> O           | 196.205 |
| Linoleamide                                                  | 2M+H                           | 559.521 |
| 1-Undecene                                                   | M+2Na                          | 100.075 |
| Dihydrocaffeic acid 3-O-glucuronide                          | M+ACN+H                        | 400.124 |
| Quercetin 3-(6"-malonyl-glucoside)                           | M+H-H <sub>2</sub> O           | 533.093 |

|                                                                                           |                                    |         |
|-------------------------------------------------------------------------------------------|------------------------------------|---------|
| Artocommunol CA                                                                           | M+H,<br>M+ACN+H                    | 433.166 |
| Isoeugenol phenylacetate                                                                  | 2M+Na                              | 587.24  |
| 5,9-Hexacosadiene                                                                         | M+Na                               | 385.379 |
| Nonadecanal                                                                               | M+ACN+H                            | 324.326 |
| N-methyl arachidonoyl amine                                                               | M+ACN+H                            | 359.305 |
| Batatasin IV                                                                              | 2M+H                               | 489.227 |
| 2',4',6',3-Tetrahydroxy-3'-geranyl-6'',6''-<br>dimethylpyrano[2'',3'':4,5]dihydrochalcone | M+ACN+H                            | 534.285 |
| 2,6-Di-tert-butyl-4-ethylphenol                                                           | M+H,<br>2M+ACN+H                   | 510.432 |
| 3-Methylheptane                                                                           | 2M+ACN+H                           | 270.315 |
| 5,8-Epoxydaucane                                                                          | M+H-H <sub>2</sub> O,<br>M+H       | 223.204 |
| 2-Dodecylbenzenesulfonic acid                                                             | M+H                                | 327.198 |
| Margaroyl-EA                                                                              | M+H                                | 314.306 |
| Octadecylamine                                                                            | M+H                                | 270.315 |
| N-Acetyldehydroanonaine                                                                   | M+ACN+Na                           | 369.12  |
| Lacto-N-biose I                                                                           | M+H                                | 384.15  |
| Citalopram N-oxide                                                                        | M+H                                | 341.164 |
| 2,3-Dehydrosalvipisone                                                                    | M+H                                | 311.164 |
| Cis-zeatin                                                                                | 2M+ACN+Na                          | 502.242 |
| 5-Dodecyldihydro-2(3H)-furanone                                                           | M+H-H <sub>2</sub> O,<br>M+H       | 237.22  |
| Hexanal hexyl isoamyl acetal                                                              | M+ACN+H                            | 314.305 |
| (+/-)N-(1-methyl-2-hydroxy-2-phenyl-ethyl) arachidonoyl<br>amine                          | 2M+ACN+H                           | 916.694 |
| 7Z,11E-Hexadecadienal                                                                     | M+H-H <sub>2</sub> O,<br>M+H       | 237.221 |
| Kessyl glycol                                                                             | M+H-2H <sub>2</sub> O,<br>2M+ACN+H | 219.173 |
| 2-(Arabinosylamino)-3-(glucosylamino)propanenitrile                                       | M+H                                | 380.166 |
| 9S,10R-Epoxy-3Z,6Z-eicosadiene                                                            | M+K,<br>M+ACN+Na                   | 331.239 |
| 2,4,12-Octadecatrienoic acid piperidide                                                   | M+ACN+H                            | 387.336 |
| Pipereicosalidine                                                                         | M+ACN+Na                           | 437.352 |
| 12,13S-EOT                                                                                | M+ACN+H                            | 334.237 |
| (Cyclohexylmethyl)pyrazine                                                                | M+Na                               | 199.121 |
| N-propyl arachidonoyl amine                                                               | M+ACN+H                            | 387.336 |
| Malvidin 3-(6-acetylglucoside)                                                            | M+2Na-H                            | 580.118 |
| N,N-Dimethylsphingosine                                                                   | M+H                                | 328.321 |
| 1-Octacosene                                                                              | M+2Na-H                            | 437.409 |
| Cellulose, microcrystalline                                                               | M+ACN+H                            | 412.181 |

|                                                           |                                                        |         |
|-----------------------------------------------------------|--------------------------------------------------------|---------|
| 5-(12-Heneicosenyl)-1,3-benzenediol                       | M+H-2H <sub>2</sub> O,<br>M+H-H <sub>2</sub> O,<br>M+H | 385.346 |
| Amylose                                                   | M+ACN+H                                                | 412.181 |
| 1-Pentadecene                                             | M+Na                                                   | 233.225 |
| N-palmitoyl serine                                        | M+H-H <sub>2</sub> O                                   | 326.269 |
| tetrahydropteroyl mono-L-glutamate                        | M+ACN+H                                                | 485.189 |
| b-D-fructosyl-a-D-(6-O-(E))-feruloylglucoside             | M+Na                                                   | 495.146 |
| 5-Nonadecyl-1,3-benzenediol                               | M+Na                                                   | 399.324 |
| 1,1'-[1,13-Tridecanediylbis(oxy)]bisbenzene               | M+H-H <sub>2</sub> O,<br>M+H                           | 369.296 |
| N-palmitoyl leucine                                       | M+H                                                    | 370.331 |
| L-Olivosyl-oleandolide                                    | M+H-H <sub>2</sub> O                                   | 499.292 |
| Cinnamyl phenylacetate                                    | 2M+Na                                                  | 527.219 |
| Dipiperamide E                                            | M+H-H <sub>2</sub> O,<br>M+H, M+2Na-<br>H, 2M+Na       | 571.245 |
| Sialyl-Lewis X                                            | M+Na                                                   | 843.284 |
| Tamsulosin                                                | 2M+K                                                   | 855.311 |
| alpha-Ionene                                              | 2M+K                                                   | 387.243 |
| Adrenoyl ethanolamide                                     | M+ACN+Na                                               | 439.329 |
| 1,5,5,8-Tetramethyl-12-thiabicyclo[9.1.0]dodeca-3,7-diene | 2M+ACN+H                                               | 514.354 |
| 2,6,6-Trimethyl-1-cyclohexen-1-acetaldehyde               | 2M+H                                                   | 333.277 |
| 11-dehydro-TXB2-d4                                        | M+2Na-H                                                | 417.218 |
| 12-oxo-PDA                                                | 2M+ACN+H                                               | 626.443 |
| 4-Prenylresveratrol                                       | 2M+Na                                                  | 615.272 |
| Pibutidine                                                | M+H-H <sub>2</sub> O                                   | 339.182 |
| Megastigmatrienone                                        | 2M+K                                                   | 419.234 |
| Oxacyclotetradecan-2-one                                  | M+H                                                    | 213.184 |
| N-oleoyl leucine                                          | M+H                                                    | 396.346 |
| Myristoleyl myristoleate                                  | M+Na                                                   | 443.387 |
| Docosahexaenoyl Ethanolamide                              | 2M+ACN+H                                               | 784.602 |
| PE(15:0/12:0(3-OH))                                       | M+2Na-H                                                | 682.4   |
| undecyl butyrate                                          | M+H                                                    | 243.231 |
| 3-Nonyl-1H-pyrazole                                       | 2M+Na                                                  | 411.346 |
| DG(10:0/12:0(3-OH)/0:0)                                   | M+K                                                    | 483.308 |
| Isoricinoleic Acid                                        | 2M+H                                                   | 597.509 |
| 18Z,21Z-Heptacosadien-10-one                              | M+Na                                                   | 413.376 |
| Alpha-Linoleoylcholine                                    | M+2Na-H                                                | 411.308 |
| formyl 7E-hexadecenoate                                   | M+H                                                    | 269.247 |
| Biperiden                                                 | 2M+ACN+Na                                              | 686.464 |
| Secoisotetrandrine                                        | M+H, M+Na,<br>M+ACN+Na                                 | 653.284 |

|                                                                                       |                                                   |         |
|---------------------------------------------------------------------------------------|---------------------------------------------------|---------|
| Riboflavine 2',3',4',5'-tetrabutanoate                                                | M+ACN+H                                           | 698.341 |
| Pandamarilactone 31                                                                   | 2M+ACN+Na                                         | 726.372 |
| Monensin A                                                                            | M+H, M+2H                                         | 336.223 |
| Serotonin                                                                             | 2M+ACN+H                                          | 394.225 |
| Eicosanoyl-EA                                                                         | M+H, M+Na                                         | 356.352 |
| (Z,Z,Z)-11,14,17-Eicosatrienyl 4-methylvalerate                                       | M+Na                                              | 413.339 |
| 3-Methyltricosane                                                                     | M+2Na-H                                           | 383.362 |
| N-Heptane                                                                             | 2M+ACN+Na                                         | 264.267 |
| 4 $\hat{I}$ $\pm$ -carboxy-5 $\hat{I}$ $\pm$ -cholesta-8,24-dien-3 $\hat{I}$ $^2$ -ol | M+H-H <sub>2</sub> O                              | 410.317 |
| 4,6-Pentacosanedione                                                                  | M+Na                                              | 403.353 |
| 2-Methyldocosane                                                                      | M+ACN+H                                           | 366.408 |
| 2-Hydroxy-24-keto-octacosanolide                                                      | M+H,<br>M+ACN+H                                   | 453.393 |
| 9,10-Hexacosadiene                                                                    | M+2Na-H                                           | 407.363 |
| N-[2-(1H-Indol-3-yl)ethyl]docosanamide                                                | M+Na                                              | 505.415 |
| 2-(9R-(15Z-docosenoyloxy)-3-methyl-2Z-decenoyloxy)-ethanesulfonic acid                | M+H-2H <sub>2</sub> O,<br>2M+3H <sub>2</sub> O+2H | 642.453 |
| 2-Hydroxy-2-methylheptan-4-one                                                        | M+H-2H <sub>2</sub> O                             | 109.101 |
| 1,2,3,4-Tetrahydro-1-phenyl-4-(1-phenylethyl)naphthalene                              | M+Na,<br>2M+ACN+H                                 | 666.37  |
| 3-Amino-1-methyl-5H-pyrido[4,3-b]indole                                               | 2M+K                                              | 433.154 |
| PE(12:0(3-OH)/16:1(9Z))                                                               | M+2Na-H                                           | 694.401 |
| 2-Heptenal                                                                            | M+H-H <sub>2</sub> O                              | 95.0856 |
| cinnamoyl-CoA                                                                         | M+K                                               | 936.12  |
| di-trans,octa-cis-undecaprenyl phosphate                                              | M+ACN+H                                           | 888.697 |
| Hovenolactone                                                                         | M+H-H <sub>2</sub> O                              | 471.347 |
| Homodihydrocapsaicin                                                                  | M+ACN+Na                                          | 385.246 |
| 2,3-dimethyloctane                                                                    | 2M+ACN+H                                          | 326.378 |
| <b>Pesticide</b>                                                                      |                                                   |         |
| Methomyl                                                                              | 2M+3H <sub>2</sub> O+2H                           | 176.058 |
| Cyromazine                                                                            | M+H-H <sub>2</sub> O,<br>M+ACN+Na                 | 230.102 |
